# Supplementary material for: Antibiotic Prescribing Trends in Belgian Out-of-Hours Primary Care during the COVID-19 Pandemic: Observational Study Using Routinely Collected Health Data
Source: MDPI journal article supplement (doi:10.3390/antibiotics10121488), 2021-12-04
Supplement: s1 [file s1]

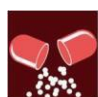*Supplemental material***Antibiotic prescribing trends in Belgian out-of-hours primary care during the COVID-19 pandemic: observational study using routinely collected health data**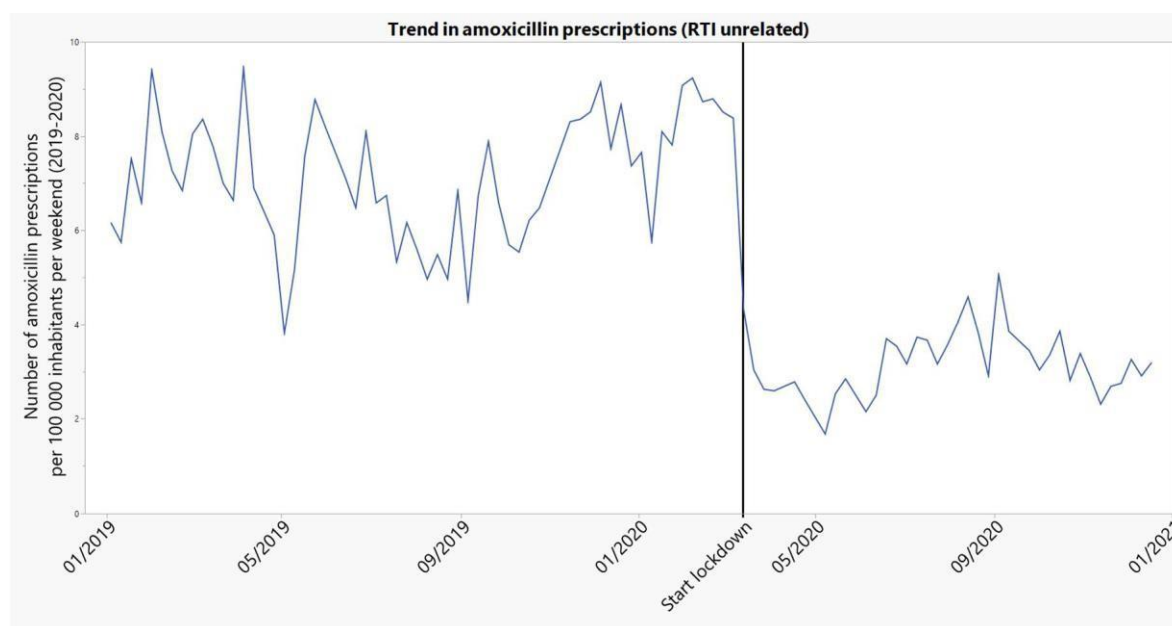

Figure S1: Number of antibiotic prescriptions per 100 000 inhabitants per weekend over time (2019-2020) for RTI unrelated contacts (ICPC codes not directly linked with possible COVID-19 infection, incl. throat/ear infections)

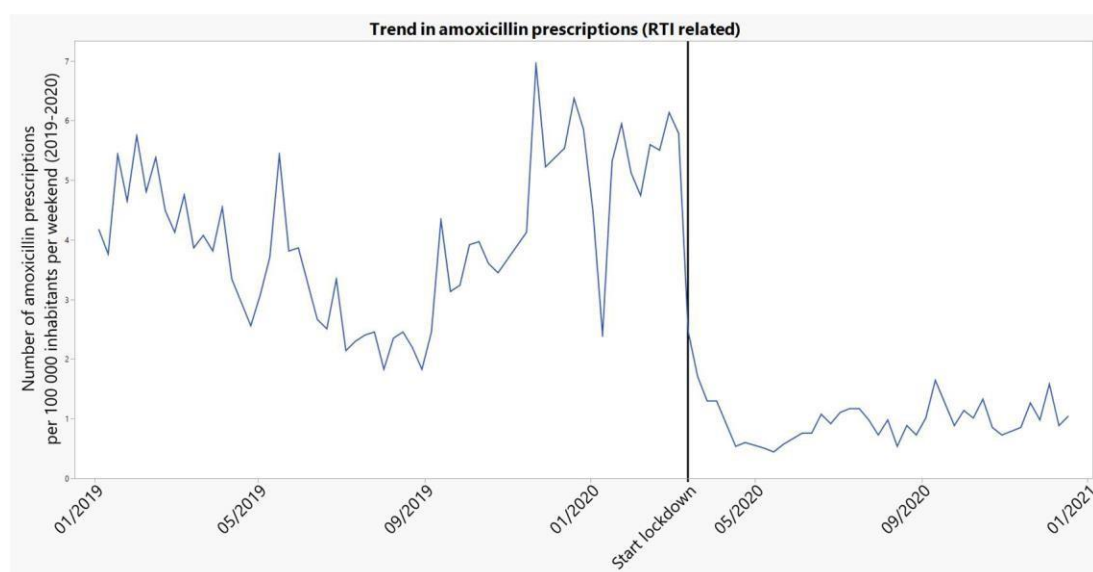

Figure S2: Number of antibiotic prescriptions per 100 000 inhabitants per weekend over time (2019-2020) for RTI related contacts (excl. throat/ear infections) (incl. ICPC codes: "R74: acute upper respiratory tract infection", "R83: other airway infections", "R81: pneumonia", "A77: other viral infections", "A78: other infections", "A03: fever", "R02: dyspnoe", "R05: coughing", "R80: influenza", "R78: acute bronchitis")

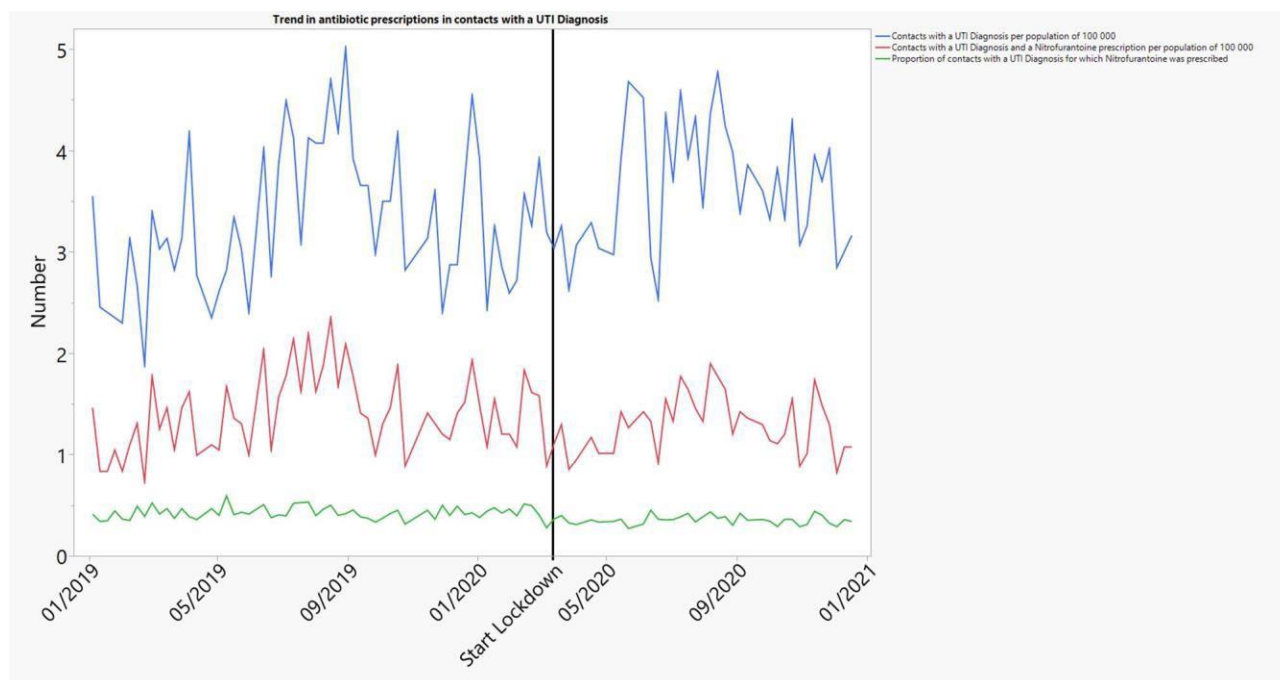

Figure S3. The trend in UTI diagnosis and nitrofurantoin prescribing per 100 000 population

**File S1: Description and model fit of the ARIMA models***2.2.1 General trend in antibiotic prescribing*

Regression with ARIMA(1,0,0) errors

Coefficients:

|      |        |           |          |
|------|--------|-----------|----------|
|      | ar1    | intercept | xreg     |
|      | 0.4815 | 26.7331   | -11.6743 |
| s.e. | 0.0852 | 0.6858    | 1.0566   |

sigma<sup>2</sup> estimated as 8.419: log likelihood=-254.58

AIC=517.16 AICc=517.57 BIC=527.74

Training set error measures:

|              | ME          | RMSE     | MAE      | MPE      | MAPE     | MASE      | ACF1         |
|--------------|-------------|----------|----------|----------|----------|-----------|--------------|
| Training set | 0.009437571 | 2.858904 | 2.237814 | -1.83116 | 10.73982 | 0.2298484 | -0.005751584 |

*2.2.2.a Trends in prescribing of amoxicillin*

Regression with ARIMA(5,0,0) errors

Coefficients:

|      |        |        |         |        |         |           |         |
|------|--------|--------|---------|--------|---------|-----------|---------|
|      | ar1    | ar2    | ar3     | ar4    | ar5     | intercept | xreg    |
|      | 0.5571 | 0.2476 | -0.2289 | 0.2059 | -0.0125 | 11.3680   | -7.3642 |
| s.e. | 0.0985 | 0.1100 | 0.1137  | 0.1151 | 0.1039  | 0.6654    | 0.9280  |

sigma<sup>2</sup> estimated as 1.928: log likelihood=-176.98

AIC=369.96    AICc=371.48    BIC=391.12

Training set error measures:

|              | ME         | RMSE     | MAE      | MPE       | MAPE     | MASE      | ACF1       |
|--------------|------------|----------|----------|-----------|----------|-----------|------------|
| Training set | 0.01922395 | 1.340457 | 0.987874 | -2.389671 | 12.91813 | 0.1809554 | 0.00608261 |

#### 2.2.2.b Trends in prescribing of amoxicillin/clavulanate

Regression with ARIMA(0,0,0) errors

Coefficients:

|      | intercept | xreg    |
|------|-----------|---------|
|      | 5.7715    | -2.1539 |
| s.e. | 0.1130    | 0.1791  |

sigma<sup>2</sup> estimated as 0.807: log likelihood=-134.1

AIC=274.19    AICc=274.43    BIC=282.12

Training set error measures:

|              | ME           | RMSE      | MAE       | MPE       | MAPE     | MASE      | ACF1      |
|--------------|--------------|-----------|-----------|-----------|----------|-----------|-----------|
| Training set | 4.656448e-16 | 0.8895524 | 0.7151907 | -3.331603 | 15.40719 | 0.3596296 | 0.1052156 |

### 2.2.3 Trend in antibiotic prescribing per contact type

a) All contacts:

Regression with ARIMA(1,0,0) errors

Coefficients:

|      | ar1    | intercept | xreg    |
|------|--------|-----------|---------|
|      | 0.4629 | 0.2160    | -0.1201 |
| s.e. | 0.0870 | 0.0044    | 0.0068  |

sigma<sup>2</sup> estimated as 0.0003677: log likelihood=262.42

AIC=-516.85 AICc=-516.44 BIC=-506.27

Training set error measures:

|              | ME            | RMSE     | MAE        | MPE       | MAPE     | MASE      | ACF1        |
|--------------|---------------|----------|------------|-----------|----------|-----------|-------------|
| Training set | -9.131262e-05 | 0.018895 | 0.01411352 | -2.157768 | 10.16329 | 0.1393096 | -0.08143524 |

b) face-to-face

Regression with ARIMA(4,0,0) errors

Coefficients:

|      | ar1    | ar2    | ar3     | ar4    | intercept | xreg    |
|------|--------|--------|---------|--------|-----------|---------|
|      | 0.3022 | 0.2089 | -0.1030 | 0.0440 | 0.2168    | -0.0519 |
| s.e. | 0.0981 | 0.1023 | 0.1035  | 0.0987 | 0.0045    | 0.0069  |

sigma<sup>2</sup> estimated as 0.0004071: log likelihood=258.79

AIC=-503.57 AICc=-502.4 BIC=-485.06

Training set error measures:

|              | ME           | RMSE       | MAE       | MPE       | MAPE     | MASE      | ACF1        |
|--------------|--------------|------------|-----------|-----------|----------|-----------|-------------|
| Training set | -6.68857e-05 | 0.01958014 | 0.0143292 | -1.181269 | 7.818679 | 0.3010191 | 0.004993282 |

### 2.2.4 Trends in prescribing of nitrofurantoin

Regression with ARIMA(2,0,1) errors

Coefficients:

|  | ar1    | ar2    | ma1     | intercept | xreg    |
|--|--------|--------|---------|-----------|---------|
|  | 0.6922 | 0.0894 | -0.5540 | 1.5120    | -0.1100 |

s.e. 0.2728 0.1328 0.2621 0.0809 0.1214

sigma^2 estimated as 0.1134: log likelihood=-31.59  
AIC=75.17 AICc=76.04 BIC=91.04

Training set error measures:

|              | ME         | RMSE      | MAE       | MPE       | MAPE    | MASE      | ACF1        |
|--------------|------------|-----------|-----------|-----------|---------|-----------|-------------|
| Training set | 0.00482198 | 0.3284207 | 0.2681592 | -4.927788 | 19.5145 | 0.7017481 | 0.004548992 |
